# Supplementary material for: Use of H19 Gene Regulatory Sequences in DNA-Based Therapy for Pancreatic Cancer
Source: Hindawi journal article supplement (doi:10.1155/2010/178174), 2010-01-01
Supplement: f1 [file 178174.f1.pdf]

Supplementary Table A

| Designation          | Sequence                       | PCR Conditions                                                                                                   |
|----------------------|--------------------------------|------------------------------------------------------------------------------------------------------------------|
| H19_Probe            | 5'-TCCTCTAGCTTCACCTTCCAGAG-3'  |                                                                                                                  |
| H19_Human Forward    | 5'-CCGGCCTTCCTGAACA-3'         | 94°C for 5 min, followed by 30 cycles of 94°C for 30 sec, 59°C for 45 sec, 72°C for 1 min, final 72°C for 5 min. |
| H19_Human Reverse    | 5'-TTCCGATGGTGTCTTTGATGT-3'    |                                                                                                                  |
| H19_mouse228 Forward | 5'-CATGTCTGGGCCTTTGAA-3'       | 94°C for 5 min, followed by 30 cycles of 94°C for 30 sec, 52°C for 45 sec, 72°C for 1 min, final 72°C for 5 min. |
| H19_mouse228 Reverse | 5'-TTGGCTCCAGGATGATGT-3'       |                                                                                                                  |
| H19_mouse454 Forward | 5'-TCTCCAGCAGAGGTGGATGT-3'     | 94°C for 5 min, followed by 30 cycles of 94°C for 30 sec, 56°C for 45 sec, 72°C for 1 min, 72°C for 5 min.       |
| H19_mouse454 Reverse | 5'-GCAGAGTTGGCCATGAAGAT-3'     |                                                                                                                  |
| DTA Forward          | 5'-TTCGTACCACGGGACTAAACCTGG-3' | 95°C for 5 min, followed by 30 cycles of 95°C for 1 min, 52°C for 40 sec, 72°C for 30 sec, final 72°C for 5 min. |
| DTA Reverse          | 5'-CCACGTTTTCCACGGGTTTCAA-3'   |                                                                                                                  |
